1           **WDR47 facilitates ciliogenesis by modulating intraflagellar transport**

2  
3   Chun-Xue Song<sup>1,2</sup>, Xian-Ting Zeng<sup>3</sup>, Wan-Xin Zeng<sup>3</sup>, Xia-Jing Tong<sup>3,\*</sup>, Qian Li<sup>1,2,4,\*</sup>

4  
5   <sup>1</sup>Center for Brain Science, Shanghai Children's Medical Center, School of Medicine,  
6   Shanghai Jiao Tong University, Shanghai, 200127, China;

7   <sup>2</sup>Department of Anatomy and Physiology, Ministry of Education-Shanghai Key  
8   Laboratory of Children's Environmental Health in Xinhua Hospital, Shanghai Jiao Tong  
9   University School of Medicine, Shanghai, 200025, China;

10   <sup>3</sup>School of Life Science and Technology, ShanghaiTech University, Shanghai 201210,  
11   China;

12   <sup>4</sup>Shanghai Research Center for Brain Science and Brain-Inspired Intelligence,  
13   Shanghai 201210, China.

14  
15   \*Correspondence to: tongxj@shanghaitech.edu.cn; liqian@shsmu.edu.cn

16  
17   Competing interests

18   The authors declare no competing interests.

19 **ABSTRACT**

20 Cilia are conserved organelles found in many cell types in eukaryotes, and their  
21 dysfunction causes defects in environmental sensing and signaling transduction; such  
22 defects are termed ciliopathies. Distinct cilia have cell-specific morphologies and exert  
23 distinct functions. However, the underlying mechanisms of cell-specific ciliogenesis  
24 and regulation are unclear. Here we identified a WD40-repeat (WDR) protein,  
25 WDR47/NMTN-1, and show that it is specifically required for ciliogenesis of AWB  
26 chemosensory neurons in *C. elegans*. WDR47/NMTN-1 is expressed in the AWB  
27 chemosensory neuron pair, and is localized at the basal body (BB) of the AWB cilia.  
28 Knockout of *wdr47/nmtn-1* causes abnormal AWB neuron cilia morphology, structural  
29 integrity, and induces aberrant AWB-mediated aversive behaviors. We further  
30 demonstrate that *wdr47/nmtn-1* deletion affects movement of intraflagellar transport  
31 (IFT) particles and their cargo delivery in AWB neurons. Our results indicate that  
32 WDR47/NMTN-1 is essential for AWB neuron ciliary morphology and function, which  
33 reveal a novel mechanism for cell-specific ciliogenesis. Since WDR47/NMTN-1 is  
34 conserved in mammals, our findings may help understand the process of cell-specific  
35 ciliogenesis and provide insights for treating ciliopathies.

36

37 **KEYWORDS:** cilia, chemosensory neuron, WD40-repeat protein, intraflagellar  
38 transport

## 39 INTRODUCTION

40 Cilia are microtubule-based sensory organelles that are found throughout most  
41 eukaryotes (Pedersen, Schroder et al. 2012). They play essential roles in diverse  
42 physiological and developmental processes, including transduction of environmental  
43 signals, establishing cell polarity, modulation of cellular motility, and regulating fluid  
44 flow (Pan, Wang et al. 2005, Berbari, O'Connor et al. 2009, Bloodgood 2010, Goetz  
45 and Anderson 2010, Dasgupta and Amack 2016, Ringers, Olstad et al. 2020).  
46 Dysfunction of cilia underlies a wide range of human syndromes—termed  
47 ciliopathies—that feature diverse phenotypes, including brain malformation, infertility,  
48 renal cyst formation, retinal degeneration, and anosmia (loss of smell) (Sharma,  
49 Berbari et al. 2008, Jenkins, McEwen et al. 2009, Brown and Witman 2014, Reiter and  
50 Leroux 2017, Uytingco, Green et al. 2019).

51  
52 Cilia comprise three major compartments: the basal body (BB) with fibrous  
53 apparatuses transition fibers and basal feet, the transition zone (TZ), and the  
54 microtubule-based ciliary scaffold known as an “axoneme” (Kobayashi and Dynlacht  
55 2011, Reiter, Blacque et al. 2012, Wei, Ling et al. 2015). Cilia are nucleated by the BB  
56 (derived from the mother centriole) and eventually protrude from the cell surface  
57 (Ishikawa and Marshall 2011). Subsequently, the TZ is templated to gate ciliary protein  
58 trafficking (Williams, Li et al. 2011). Known ciliary cargos include cilia structural  
59 components, G-protein-coupled receptors, ion channels, and other signaling  
60 molecules (Inglis, Ou et al. 2007, Lechtreck 2015, Nachury 2018). Those cargos are  
61 transported bi-directionally along the axoneme via a process called intraflagellar  
62 transport (IFT) (Hao and Scholey 2009). IFT components are recruited to elongate the  
63 ciliary axoneme. The IFT machinery consists of kinesin-2 and IFT-dynein motors,  
64 together with IFT-A and the IFT-B cargo adaptor complexes, that mediate the  
65 bidirectional movement of IFT cargos along the axoneme (Hao and Scholey 2009,  
66 Jordan and Pigino 2021). The anterograde IFT motors of the kinesin-2 family transport  
67 IFT particles from the cilia base to the cilia tip for incorporation into ciliary structures,  
68 while the retrograde IFT motors of dynein recycle kinesin-2 and IFT particles back to

69 the cilia base (Hao and Scholey 2009, Prevo, Scholey et al. 2017). Besides, the Bardet  
70 Biedl syndrome (BBS) proteins are required to stabilize the association of IFT motors  
71 and IFT particles (Ou, Blacque et al. 2005, Uytingco, Williams et al. 2019). This  
72 bidirectional cargo transport is essential for ciliogenesis (Ishikawa and Marshall 2011).  
73 It has been reported that impairment of IFT leads to defects in cilia structure and  
74 function across different species. In *C. elegans*, mutations in IFT particle genes and  
75 motor genes have been shown to alter the cilia morphology of chemosensory neurons  
76 (Saikat Mukhopadhyay, Hongmin Qin et al. 2007). Inactivation of the IFT component  
77 IFT88 results in shortened cilia in a mouse model of polycystic kidney disease (Shao,  
78 El-Jouni et al. 2020). In addition, loss of BBS proteins leads to disorganization of the  
79 dendritic microtubule network of olfactory cilia, and causes anosmia in mice (Kulaga,  
80 Leitch et al. 2004).

81

82 Although the basic assembly mechanisms and structures of cilia are highly conserved,  
83 it is clear that these structures exhibit distinct lengths and morphologies depending on  
84 the identity and condition of the cells they are generated within; it is also clear that  
85 specialized cilia exert unique functional roles (Silverman and Leroux 2009). For  
86 example, the multiciliated protist model *Tetrahymena* carries two types of cilia (oral  
87 and locomotory) that exhibit asymmetries in the anterior-posterior and left-right axes  
88 (Soares, Carmona et al. 2019). These two types of cilia have different mechanisms to  
89 control cilia oscillation and to sense viscosity (Jung, Powers et al. 2014). In mammals,  
90 cilia of mammalian olfactory sensory neurons are known to have different lengths in  
91 distinct regions of the olfactory epithelium (Challis, Tian et al. 2015). Olfactory sensory  
92 neurons situated in the anterior areas have longer cilia and are more sensitive to  
93 odorants than those in the posterior regions (Challis, Tian et al. 2015). These findings  
94 make it clear that cilia identity (including morphology and function) is under strict  
95 control. However, any mechanisms through which the unique genesis, structural  
96 maintenance, and/or function of such cell-specific cilia remain elusive.

97

98 *C. elegans* has been repeatedly used as a model system to explore mechanisms

99 regulating cell-specific cilia morphology and function (Inglis, Ou et al. 2007, Ou, Koga  
100 et al. 2007, Barr 2011). *C. elegans* has exactly 60 ciliated cells, with variable  
101 morphology and function (Bargmann 2006). Among the ciliated neurons, AWA, AWB,  
102 AWC, ASH, and ADL neurons belong to chemosensory neurons, enabling worms to  
103 detect a wide variety of volatile (olfactory) and water-soluble (gustatory) cues  
104 associated with food and danger (Emily R. Troemel 1997, Bargmann 2006, Hart and  
105 Chao 2010, Yoshida, Hirotsu et al. 2012, Li and Liberles 2015). Regarding morphology,  
106 AWA, AWB, and AWC neurons have “wing” cilia with distinct wing-like morphologies,  
107 while the ASH and ADL neurons have “channel” cilia with rod-like shapes (Inglis, Ou  
108 et al. 2007). For odorant recognition, the AWA and AWC neuron pairs detect volatile  
109 attractants (Cornelia I. Bargmann 1993, Sengupta 2007), while ASH, ADL, and AWB  
110 neurons respond to volatile repellants (Chao, Komatsu et al. 2004, Sengupta 2007).  
111 Thus, the cilia of particular chemosensory neurons of *C. elegans* represent an  
112 excellent model system to explore the cell-specific regulation of cilia morphology and  
113 function.

114  
115 WD40-repeat (WDR) protein family is a large group of proteins containing the WDR  
116 motifs comprised of approximately 40 amino acids terminating in tryptophan (W) and  
117 aspartic acid (D) (Kim and Kim 2020). At least 17 different WDR proteins are  
118 associated with ciliopathies and majority of them have been identified as IFT  
119 components. One of the WDR proteins, WDR47 has been implicated in regulating  
120 formation of the central pair microtubules and ciliary beat in the motile cilia (Liu, Zheng  
121 et al. 2021). However, its function in the primary cilia, such as the chemosensory  
122 neurons remains unknown. Since WDR47 is highly conserved with NMTN-1 as the  
123 homolog in *C. elegans*, we intend to investigate if WDR47/NMTN-1 regulates the  
124 function of specific chemosensory neurons in *C. elegans*.

125  
126 Here we discover that WDR47/NMTN-1 is required for AWB-mediated avoidance  
127 behaviors. After showing that WDR47/NMTN-1 is expressed in the AWB neuron pair  
128 and is enriched at the BB of AWB cilia, we demonstrate that knockout of *wdr47/nmtn-*

129 *1* affects the cilia length and morphology of the AWB neurons as well as AWB-  
130 mediated chemosensation. Explaining these mutant phenotypes, our data support that  
131 WDR47/NMTN-1 helps to maintain appropriate IFT motor movement and proper IFT  
132 cargo delivery. In all, our results indicate that WDR47/NMTN-1 participates in the  
133 ciliogenesis via IFT particle movement in a cell-specific manner. Since WDR47/NMTN-  
134 1 is conserved in mammals, the mechanism we identified here may help us to better  
135 understand the process of cell-specific ciliogenesis and molecular mechanism for cilia  
136 identity.

137

## 138 **RESULTS**

### 139 **WDR47/NMTN-1 is expressed in the AWB chemosensory neuron pair**

140 To examine the expression pattern of WDR47/NMTN-1 in *C. elegans*, we generated  
141 transgenic animals expressing GFP under the *wdr47/nmtn-1* promoter. We detected  
142 the strong GFP signals in both the ciliated amphid and phasmid neurons (Fig. 1A).  
143 Next, we focused on the amphid chemosensory neurons and asked if WDR47/NMTN-  
144 1 is expressed in specific chemosensory neurons. There are five pairs of  
145 chemosensory neurons (olfactory) that detect volatile odors (Hart and Chao 2010).  
146 AWA and AWC neurons respond to volatile attractants (Cornelia I. Bargmann 1993,  
147 Sengupta 2007), while ASH, ADL, and AWB neurons respond to volatile repellants  
148 (Chao, Komatsu et al. 2004, Sengupta 2007). We labeled the individual chemosensory  
149 neuron pairs by expressing mCherry under neuron-type specific promoters (*odr-10*  
150 promoter for AWA, *str-1* promoter for AWB, *str-2* promoter for AWC, and *srb-6* promoter  
151 for ASH/ADL). We found strong GFP signals in the AWB neurons but not AWA or  
152 ASH/ADL neurons, and found a dim GFP signal in the AWC neurons (Fig. 1B-C).  
153 These data show that WDR47/NMTN-1 is expressed in the AWB chemosensory  
154 neuron pair known to function in chemosensation and aversion behaviors (Emily R.  
155 Troemel 1997).

156

### 157 **WDR47/NMTN-1 is localized at the basal body (BB) of cilia**

158 To study the subcellular localization of WDR47/NMTN-1 in AWB neurons, we

159 constructed a mNeonGreen-NMTN-1 (MNG::NMTN-1) fusion protein with expression  
160 under the *wdr47/nmtn-1* promoter (*Pnmtn-1*). The mNeonGreen signals were enriched  
161 in the base of cilia and cell body of AWB neurons (Fig. 1D). We also constructed a C-  
162 terminal tagged NMTN-1-mNeonGreen (NMTN-1::MNG) fusion protein (same  
163 promoter), and found a similar localization pattern as the N-terminal tagged  
164 MNG::NMTN-1 (Fig. 1E). We also investigated the expression pattern of NMTN-1 at  
165 different developmental stages using the *Pnmtn-1::MNG::NMTN-1* fusion protein, and  
166 found that NMTN-1 was expressed in the cilia of the AWB neurons from egg to adult  
167 (day4) (Supplementary Fig. 1A-B).

168  
169 There are two substructures at the base of cilia known to affect ciliogenesis and control  
170 ciliary protein composition: the basal body (BB) and the transition zone (TZ) (Fig. 1H)  
171 (Reiter, Blacque et al. 2012). Cilia are nucleated by the BB, and beyond the BB lies  
172 the TZ that acts as a “gate” to regulate the IFT-dependent trafficking of ciliary proteins  
173 to and from cilia (Ishikawa and Marshall 2011). To detect if WDR47/NMTN-1 is  
174 expressed in the BB and/or TZ, we labeled these substructures with mCherry-tagged  
175 MKS-5 and DYF-19 (Wei, Xu et al. 2013, Nechipurenko, Olivier-Mason et al. 2016).  
176 WDR47/NMTN-1 was co-localized with DYF-19 (Supplementary Fig. 2A-B),  
177 suggesting that WDR47/NMTN-1 is localized at the BB of the cilia of AWB neurons.  
178 We also verified the colocalization of WDR47/NMTN-1 and DYF-19 driven by the *str-*  
179 *1* promoter in the AWB neurons (Fig. 1F-G). The localization of WDR47/NMTN-1 in  
180 the BB implies that WDR47/NMTN-1 may regulate the BB structure. To test this  
181 possibility, we examined the distribution of mCherry-tagged DYF-19 proteins in  
182 *wdr47/nmtn-1* mutants. No abnormal localization of DYF-19 proteins was observed in  
183 *wdr47/nmtn-1* mutants, indicating that loss of WDR47/NMTN-1 may not affect the  
184 localization of ciliary base proteins (Supplementary Fig. 3).

185

### 186 ***Wdr47/nmtn-1* mutation causes morphology defects of AWB cilia**

187 Given that the BB is known to function as a nucleation site for cilia biogenesis (Marshall  
188 2008), we wondered whether WDR47/NMTN-1 might participate in the morphology of

189 the AWB wing cilia. We classified the AWB cilia phenotypes into 3 categories using a  
190 previously reported method of quantifying AWB cilia morphologies (Olivier-Mason,  
191 Wojtyniak et al. 2013). Briefly, category 1 cilia have characteristic Y-shaped  
192 morphology with 2 primary branches and no fans. Category 2 cilia have enlarged fans  
193 along the primary branches. Category 3 cilia have more than one secondary branch  
194 emanating from the primary branch (Fig. 2A). We quantified the percentage of 3  
195 categories in wild type and *wdr47/nmtn-1* mutants, and found that the percentage of  
196 category 1 cilia is significantly increased in *wdr47/nmtn-1* mutants, while the  
197 percentage of category 2 cilia is significantly decreased in these animals (Fig. 2B). We  
198 also measured the length of the AWB cilia: the typical AWB cilia contain 2 primary  
199 branches with unequal lengths, and we found that the lengths of both long and short  
200 branches in *wdr47/nmtn-1* mutants were significantly shorter than in wild type (Fig.  
201 2C). These results collectively support that WDR47/NMTN-1 regulates cilia  
202 morphology of the AWB neurons.

203  
204 Recall our aforementioned observation of a dim WDR47/NMTN-1 signal in AWC  
205 neurons (Fig. 1B); we therefore examined AWC cilia morphology in *wdr47/nmtn-1*  
206 mutants. An abnormal morphology with discrete fan-shape cilia structure was  
207 occasionally observed in *wdr47/nmtn-1* mutants (16% in *wdr47/nmtn-1* mutants vs. 0%  
208 in wild type, Supplementary Fig. 4A-B). However, there were no significant differences  
209 in the AWC cilia area between *wdr47/nmtn-1* mutants and wild type animals  
210 (Supplementary Fig. 4C). We also investigated whether WDR47/NMTN-1 is required  
211 to maintain cilia morphology in other cell types using OSM-6-GFP fusion proteins to  
212 label cilia in all amphid ciliated sensory neurons. We found no significant changes in  
213 overall cilia length in *wdr47/nmtn-1* mutants in cells other than the AWB neurons  
214 (Supplementary Fig. 4D-E).

215

### 216 ***Wdr47/nmtn-1* mutation causes structural integrity defects of AWB cilia**

217 We also performed a Dil dye-filling experiment—which is routinely used to validate the  
218 structural integrity of cilia (Tong and Burglin 2010)—to assess the specific impacts of



219 WDR47/NMTN-1 in maintaining the AWB cilia structural integrity. After 30 minutes of  
220 Dil exposure, we analyzed the fluorescence intensity of Dil in the cell body. The dye  
221 signal in the AWB neurons of *wdr47/nmtn-1* mutants was significantly dimmer than in  
222 the wild type (Fig. 2D-E), suggesting apparent structural integrity defects in the mutant  
223 AWB cilia. In contrast, no Dil absorption defects were observed in other neurons (Fig.  
224 2F). Furthermore, the Dil dye absorption defects in the AWB neurons of *wdr47/nmtn-*  
225 *1* mutants were restored upon the specific expression of WDR47/NMTN-1 in the AWB  
226 neurons driven by the *str-1* promoter (Fig. 2D-E). Those data suggest that  
227 WDR47/NMTN-1 functions to maintain the structural integrity of the AWB neuron cilia.

228

### 229 **WDR47/NMTN-1 is required for AWB-mediated aversion behaviors**

230 The abnormal cilia morphology we detected in the AWB neurons of *wdr47/nmtn-1*  
231 mutants prompted us to test if WDR47/NMTN-1 is required for the AWB-mediated  
232 chemosensation behaviors. The AWB neurons are known to mediate aversion  
233 behaviors in response to odorants such as 2-nonanone, and these responses require  
234 intact and functional cilia (Emily R. Troemel 1997, Hart and Chao 2010). We conducted  
235 a classic chemotaxis assay to examine aversion behavior to 2-nonanone (Fig. 3A).  
236 Briefly, 9 cm plates containing regular NGM media were spotted with control (Ethanol)  
237 or 2-nonanone on opposite sides, and the paralysis agent sodium azide was added  
238 immediately before the addition of worms in the center of the plates (Fig. 3A). In line  
239 with the previous report (Cornelia I. Bargmann 1993), we observed that wild type  
240 animals were repelled by 2-nonanone and thus had a negative chemotaxis index value.  
241 The chemotaxis index value was significantly increased in the *wdr47/nmtn-1* mutants  
242 (Fig. 3B). Further, restoring WDR47/NMTN-1 expression either in the WDR47/NMTN-  
243 1-expressing neurons (under the *wdr47/nmtn-1* promoter) or in the AWB neurons  
244 (under the AWB-specific *str-1* promoter) rescued the chemotaxis defects (Fig. 3B). We  
245 also observed an impaired aversion response to octanol in the *wdr47/nmtn-1* mutants;  
246 octanol is known to act on a group of neurons including AWB (Fig. 3C) (Chao, Komatsu  
247 et al. 2004). No effects were observed when we investigated the attraction behaviors  
248 to different dilutions of diacetyl, mediated by the AWA neuron (Fig. 3D) (Cornelia I.

249 Bargmann 1993). We did observe an impaired AWC-mediated attraction response to  
250 isopentyl alcohol in *wdr47/nmtn-1* mutants (Fig. 3E) (Cornelia I. Bargmann 1993),  
251 which may be due to the dim WDR47/NMTN-1 signal in the AWC neurons (Fig. 1B).  
252 Collectively, our data support the notion that WDR47/NMTN-1 functions in the AWB  
253 neurons to participate in the chemosensation behavior.

254

### 255 **The overall ultrastructure of AWB cilia is not affected by *wdr47/nmtn-1* mutation**

256 To explore the mechanisms underlying WDR47/NMTN-1's impacts on ciliogenesis, we  
257 probed the ultrastructure of amphid cilia using transmission electron microscopy (TEM)  
258 (Serwas and Dammermann 2015). Unlike the axonemes of channel cilia, the  
259 microtubules in the AWB cilia lack an obvious organization (David B Doroquez, Berciu  
260 et al. 2014). We did not detect any microtubules in the distal segments of the AWB  
261 cilia, yet we did note the presence of singlet microtubules in the middle segments.  
262 However, no obvious abnormalities of the axoneme structure in the middle segments  
263 were observed in the *wdr47/nmtn-1* mutants (Supplementary Fig. 5), suggesting no  
264 disruption of the overall ultrastructure of AWB cilia.

265

### 266 ***Wdr47/nmtn-1* mutation perturbs the velocity distributions of IFT components**

267 Ciliogenesis and cilia structure require the IFT-mediated bidirectional transport of  
268 particles along the microtubules (Hao and Scholey 2009), so we examined if deletion  
269 of *wdr47/nmtn-1* influences IFT particle movement. In *C. elegans*, two members of the  
270 kinesin-2 family, heterotrimeric kinesin-II (including KAP-1 protein) and homodimeric  
271 OSM-3 cooperate to form two sequential anterograde IFT pathways that build distinct  
272 parts of cilia (Scholey 2008). IFT particles involve two sub-complexes: IFT-A and IFT-  
273 B. IFT-A associates with kinesin-II, while IFT-B associates with OSM-3 during  
274 anterograde transport (Pedersen and Christensen 2012). To specifically examine IFT  
275 movement in the AWB neurons (Brust-Mascher, Ou et al. 2013), we expressed an  
276 MNG reporter fusion variant of KAP-1 and OSM-3 motor proteins, and the IFT-B  
277 complex subunit OSM-6 in the AWB neuron pair (under the AWB-specific *str-1*  
278 promoter) (Supplementary Fig. 6A). In the AWB cilia of wild type animals, the velocity

279 of OSM-3 (0.87  $\mu\text{m/s}$ ) was a bit faster than that of KAP-1 and OSM-6 (0.64  $\mu\text{m/s}$  and  
280 0.63  $\mu\text{m/s}$ ) in the middle segments (Figure. 4A, Table 1). This is possibly due to the  
281 fact that some OSM-3 motors move alone in the middle segments, which is consistent  
282 with previous reports (Saikat Mukhopadhyay, Hongmin Qin et al. 2007). Interestingly,  
283 the velocity of OSM-3 (0.94  $\mu\text{m/s}$ ) was increased in the AWB cilia middle segments of  
284 *wdr47/nmtn-1* mutants, while the velocity of OSM-6 (0.53  $\mu\text{m/s}$ ) was decreased in  
285 *wdr47/nmtn-1* mutants (Fig. 4A, Table 1). We did not observe changes in the velocity  
286 of KAP-1. Those data indicate that loss of *wdr47/nmtn-1* perturbs the velocity  
287 distributions of IFT components. As controls, we did not detect significant changes in  
288 IFT velocities in the ASH or ADL cilia (under the *srb-6* promotor) (Table 1), further  
289 suggesting that WDR47/NMTN-1 is important for proper IFT movement in the AWB  
290 cilia.

291

292 To examine whether WDR47/NMTN-1 is one of the IFT components or otherwise  
293 physically associates with the IFT machinery, we analyzed the mobility of  
294 WDR47/NMTN-1 by kymograph: neither anterograde nor retrograde movement was  
295 observed (Supplementary Fig. 6B), indicating that the observed regulatory impacts of  
296 WDR47/NMTN-1 knockout on IFT movement may result from indirect interactions with  
297 IFT machinery.

298

### 299 ***Wdr47/nmtn-1* mutation alters IFT cargo localization**

300 Since WDR47/NMTN-1 is required for IFT particle movement, we next examined  
301 whether IFT cargo transport requires WDR47/NMTN-1. As one of the IFT cargo, TAX-  
302 4 is the cyclic nucleotide-gated channel protein localized on the cilia membrane and  
303 participates in the olfactory signaling pathway (Bargmann 1996, Bargmann 2006). We  
304 studied the subciliary localization of TAX-4 in the *wdr47/nmtn-1* mutants. We  
305 expressed TAX-4::sfGFP fusion protein in the AWB neurons (under the *str-1* promoter)  
306 and found that TAX-4 was localized in the cilia in all of the wild type animals (Fig. 4B-  
307 C). In contrast, TAX-4 was mislocalized to the base of cilia in 20%-30% of *wdr47/nmtn-1*  
308 mutants (Fig. 4B). We also found that TAX-4 was mislocalized to the TZ region above

309 the BB (Fig. 4C). These results further support the conclusion that WDR47/NMTN-1 is  
310 required for the IFT particle movement and cargo transportation, by which to support  
311 ciliogenesis and ciliary structure in the AWB neurons.

312

## 313 **DISCUSSION**

314 In this study, we revealed how WDR47/NMTN-1 supports AWB cell-specific  
315 ciliogenesis and chemosensation in *C. elegans*. We showed that WDR47/NMTN-1 is  
316 expressed in the AWB chemosensory neurons and is enriched in the BB of the AWB  
317 cilia. WDR47/NMTN-1 functions in the AWB neurons to maintain AWB cilia morphology,  
318 structural integrity and AWB-mediated aversion behaviors. We further demonstrated  
319 that WDR47/NMTN-1 ensures proper IFT particle movement and cargo delivery in the  
320 AWB neurons, promoting ciliogenesis.

321

322 WDR47/NMTN-1 has been revealed as a microtubule-associated protein; it has been  
323 shown to interact with CAMSAP family proteins for microtubule-mediated processes  
324 (Chen, Zheng et al. 2020, Buijs, Hummel et al. 2021, Liu, Zheng et al. 2021). In non-  
325 centrosomal microtubules, WDR47/NMTN-1 protects CAMSAP2 against katanin-  
326 mediated severing and is required for axonal and dendritic development (Buijs,  
327 Hummel et al. 2021). In mammalian multicilia, WDR47/NMTN-1 co-operates with  
328 CAMSAP family proteins and MT-severing enzyme katanin to generate ciliary central  
329 microtubules (Liu, Zheng et al. 2021). WDR47/NMTN-1 also functions through  
330 CAMSAP3 to control neuronal migration and the early stages of neuronal polarization,  
331 which is important for neonatal mouse survival (Chen, Zheng et al. 2020). In addition,  
332 WDR47/NMTN-1 has been shown to interact with microtubule-associated protein 8  
333 (Wang, Lundin et al. 2012) and participates in several microtubule-mediated  
334 processes including neural stem cell proliferation, radial migration, and growth cone  
335 dynamics (Kannan, Efil Bayam et al. 2017). Thus, multiple studies have conceptually  
336 linked WDR47/NMTN-1 with the regulation of microtubule-associated processes in  
337 neuron axons, dendrites, and motile cilia. In the present study, we discovered an  
338 additional role of WDR47/NMTN-1 in IFT particle movement and cell-specific

339 ciliogenesis. It is likely that WDR47/NMTN-1 controls IFT particle movement via  
340 regulating ciliary microtubule networks.

341

342 Our results illustrate a cell-specific function of WDR47/NMTN-1 in ciliogenesis. This  
343 cell-specific modulation may have evolved to accommodate different olfactory  
344 receptors, channels, and/or IFT machinery in other chemosensory neurons to support  
345 diversified functions (Saikat Mukhopadhyay, Hongmin Qin et al. 2007, Silverman and  
346 Leroux 2009, Wojtyniak, Brear et al. 2013, 2014). Note that previous studies have  
347 reported that IFT-A molecules differentially regulate sensory cilia structures. IFT-121  
348 and IFT-140 are required for all examined cilia in the amphid and phasmid neurons,  
349 whereas IFT-139 is required for ciliogenesis of AWC neuron-specific cilia (Scheidel  
350 and Blacque 2018). KLP-6, a conserved member of Kinesin-3 family, regulates IFT in  
351 the male-specific cilia (Morsci and Barr 2011). In addition, a few endocytic genes  
352 regulate ciliary and periciliary membrane compartment morphology in different cilia  
353 types, including the AWB cilia and 3 channel cilia (Kaplan, Doroquez et al. 2012).  
354 Similar to chemosensory neurons in *C. elegans*, mammalian olfactory sensory  
355 neurons are also divided into discrete subpopulations that contain distinct subfamilies  
356 of olfactory receptors in the cilia (Bear, Lassance et al. 2016). It will be quite interesting  
357 to explore the possibility that WDR47 orthologues may regulate the primary cilia of  
358 olfactory sensory neurons in mammals in a cell-specific manner.

359

360 Many WDR proteins, such as CHE-2/IFT80, WDR35/IFT121, DAF-10/IFT122, CHE-  
361 11/IFT140, and OSM-1/IFT172 are also required for ciliogenesis in analogy to  
362 WDR47/NMTN-1 (Manabi Fujiwara 1999, Qin, Rosenbaum et al. 2001, Quidwai,  
363 Wang et al. 2021). They are all mobile and act as IFT binding proteins. However,  
364 WDR47/NMTN-1 does not undergo IFT, so we speculate that WDR47/NMTN-1 may  
365 indirectly regulate IFT machinery. How does WDR47/NMTN-1 regulate the IFT  
366 velocities? Our observation that *wdr47/nmtn-1* perturbs the velocity distributions of IFT  
367 components has also been reported in *nphp-4* and *arl-13* mutants (Jauregui, Nguyen  
368 et al. 2008, Cevik, Hori et al. 2010). The velocity of OSM-3 is increased, while the

369 velocity of OSM-6 is decreased in *nphp-4* and *arl-13* mutants. On the other hand, the  
370 velocity of KAP-1 is unchanged and decreased in *nphp-4* and *arl-13* mutants,  
371 respectively. They showed that OSM-6 is associated with kinesin-II other than OSM-3  
372 in the absence of *nphp-4* (Jauregui, Nguyen et al. 2008), and OSM-3 is uncoupled  
373 from kinesin-II in *arl-13* mutants (Cevik, Hori et al. 2010). In wild type animals, the  
374 kinesin-II and OSM-3 units are linked by the BBS proteins, among these BBS-7 and  
375 BBS-8 are required to stabilize kinesin-II and OSM-3 (Ou, Blacque et al. 2005, Pan,  
376 Ou et al. 2006). Two kinases, the cell cycle-related kinase DYF-18 and the ros-cross  
377 hybridizing kinase family member MAK DYF-5 are important for stabilizing the  
378 interaction between IFT particles and OSM-3 (Yi, Xie et al. 2018). BBS components  
379 are predominantly localized at the base of cilia, and DYF-5 protein is mainly expressed  
380 in dendrites and TZ, and weakly expressed in cilia (Blacque, Reardon et al. 2004, Yi,  
381 Xie et al. 2018). Based on the fact that WDR47/NMTN-1 is localized in the BB of cilia,  
382 we suspect that WDR47/NMTN-1 may interact with BBS-7/8 and/or DYF-5/18 to  
383 maintain the coupling of OSM-3 and kinesin-II, or to regulate the binding of IFT  
384 particles with motor proteins. The overall effects lead to reduction of cargos  
385 transported to the cilia. This hypothesis is consistent with the observation that IFT  
386 cargo TAX-4 was detained in the base of the AWB cilia in some *wdr47/nmtn-1* mutants.

387

## 388 **MATERIALS AND METHODS**

### 389 **Animals**

390 *C. elegans* were maintained under standard conditions at 20 °C on nematode growth  
391 medium (NGM) plates seeded with *E. coli* OP50. All *C. elegans* strains were derived  
392 from the wild type Bristol N2 (Caenorhabditis Genetics Center) strain. The  
393 *wdr47/nmtn-1* mutant has a 483bp deletion in the second exon (chr1: 29916/29917-  
394 30399/30400). Transgenic animals were prepared by microinjection, and integrated  
395 transgenes were isolated following UV irradiation. A complete list of strains is provided  
396 in Supplementary Table 1.

397

### 398 **Plasmids**

399 All expression vectors used are pPD49.26 or pPD95.75. A 3 kb *str-2* promoter was  
400 amplified from genomic DNA and cloned for expression in AWC chemosensory  
401 neurons. A 3 kb *odr-10* promoter was amplified from genomic DNA and cloned for  
402 expression in AWA chemosensory neurons. A 3 kb *str-1* promoter was amplified from  
403 genomic DNA and cloned for expression in AWB chemosensory neurons. A 3 kb *srb-*  
404 *6* promoter was amplified from genomic DNA and cloned for expression in ADF, ADL,  
405 and ASH chemosensory neurons. A complete list of primers used for cloning is  
406 provided in Supplementary Table 2.

407

### 408 **Live imaging and analysis**

409 All hermaphrodites imaged were young adult animals. Worms were anesthetized with  
410 30  $\mu\text{g}/\mu\text{l}$  2,3-butanedione monoxime (Sigma), mounted on the 2% agar pads.  
411 Fluorescent images were collected on a fluorescence microscope 100 $\times$  (NA = 1.4)  
412 objective on an Olympus microscope (BX53) and a Nikon spinning disc confocal  
413 microscope (Yokogawa CSU-W1) equipped with a 60 $\times$  oil objective. The images were  
414 further processed using ImageJ software.

415

416 For the time-lapse imaging experiment, worms were anesthetized with 10 mM  
417 levamisole, mounted on 5% agar pads. The images were taken on a Nikon spinning  
418 disc confocal microscope (Yokogawa CSU-W1) with a 60 $\times$  oil objective. The exposure  
419 time of the time-lapse images is 300 ms. We used ImageJ software to process images,  
420 generate kymographs, and quantify IFT velocity. To ensure the quality of images used  
421 for quantification, only movies with worms in stable focal planes were used to generate  
422 kymographs. The anterograde kymographs were generated with the Reslice function  
423 in ImageJ by manually drawing lines along the AWB cilia.

424

### 425 **Dye-filling assay**

426 Worms were washed with M9 buffer, and then incubated with the fluorescent lipophilic  
427 carbocyanine dye Dil in the dark for 30 min at room temperature. Dil was prepared as  
428 a 1 mg/ml stock solution in DMSO and diluted at 1:100 in M9 buffer. After incubation

429 with Dil, worms were washed with M9 buffer again and transferred to seeded NGM  
430 plates for one or two hours to remove autofluorescence from the gut. Worms were  
431 then anesthetized with 10% levamisole, mounted on the 2% agar pads and imaged  
432 using a Nikon spinning disc confocal microscope (Yokogawa CSU-W1) with a 60× oil  
433 objective.

434

### 435 **Chemotaxis assay**

436 The plates used for chemotaxis assay are 9 cm tissue culture dishes containing 10 ml  
437 of 1.6% agar, 5 mM potassium phosphate (pH 6.0), 1 mM CaCl<sub>2</sub>, and 1 mM MgSO<sub>4</sub>.  
438 The plates were autoclaved and stocked at 4°C. On the day of the experiments, the  
439 plates were taken out from 4°C to sit at room temperature until dry. The middle of the  
440 plates was marked on the back as the site for the initial location of the animals. In  
441 addition, two marks were labeled around 3 cm away from the middle of the plate. The  
442 two marks represent the sites for chemical and ethanol (control).

443

444 Synchronized young adult animals were washed three times with 1 ml S Basal buffer  
445 [5.9 g NaCl, 50 ml 1 M potassium phosphate (pH 6.0), 1 ml cholesterol (5 mg/ml in  
446 ethanol) in 1 L ddH<sub>2</sub>O]. Then the worms were washed two times with 1 ml water to  
447 remove bacteria, and were centrifuged at 3,000 rpm for 2 mins. The supernatants were  
448 removed as much as possible. 5 µl solution containing the worms was pipetted in the  
449 center of the plates. 1 µl of 1 M sodium azide was added to freeze animals on the  
450 control and chemical side. Next, 1 µl ethanol was added on the control side, and 1 µl  
451 chemical was added on the chemical side. After two hours, the number of animals on  
452 both the control and chemical side were counted. Note that the worms within 1 cm  
453 from the center were excluded. The chemotaxis indexes were calculated by using this  
454 formula: (Number of animals on the chemical side – Number of animals on control side)  
455 / (Number of animals on chemical side + Number of animals on the control side). The  
456 chemicals are provided in Supplementary Table 2.

457

### 458 **Transmission electron microscopy**



459 We chose a type A carrier (100  $\mu$ m + 200  $\mu$ m, Leica, #16770181), dipped 200  $\mu$ m  
460 surface with 1-hexadecene, and dried it with filter paper. The young adult  
461 hermaphrodites treated with 10 mM levamisole were transferred to M9 buffer  
462 containing 10% bovine serum albumin in the cavity of the carrier. The flat surface of  
463 the type B carrier (0 + 300  $\mu$ m, Leica, #16770182) was placed on top to enclose the  
464 worms in the aluminum planchette's cavity. The specimen–planchette sandwich was  
465 rapidly frozen using a Leica EM ICE high-pressure freezing system. Freeze-  
466 substitution was performed at low temperature ( $-90^{\circ}\text{C}$ ) over three days in a solution  
467 containing 2% osmium tetroxide, 1% uranyl acetate in anhydrous acetone using a  
468 Leica EM AFS2 freeze-substitution system. The temperature progressively increased  
469 up to  $4^{\circ}\text{C}$ . Samples were washed four times with anhydrous acetone (10 min each),  
470 and then successively infiltrated with a mixture of acetone resin of 3:1; 1:1; 1:3,  
471 respectively. Then samples were infiltrated and embedded in resin at room  
472 temperature and polymerized in an oven at  $60^{\circ}\text{C}$  for three days. Resin blocks with  
473 specimens were trimmed so that the block face was perpendicular to the longitudinal  
474 axis of the worm nose for sections, while keeping a small amount of resin around the  
475 specimen. Ultrathin sections (70 nm thickness) were collected and post-stained with  
476 0.08 M lead citrate for 10 min. Sections were imaged on a 120 kV projection electron  
477 microscope (FEI, Talos L120C).

478

#### 479 **Quantification and statistical analysis**

480 All plots were generated by GraphPad Prism (version 7.0a). All scatterplots were  
481 shown as mean  $\pm$  SEM. We used a two-tailed Student's t-test to determine statistical  
482 differences except for the Chi-square test in Fig. 2B.

483

#### 484 **ACKNOWLEDGEMENTS**

485 We want to thank Xiumin Yan and Yidong Shen at the Institute of Biochemistry and  
486 Cell Biology, Shanghai Institutes for Biological Sciences, Chinese Academy of  
487 Sciences for kindly providing *wdr47/nmtn-1* mutants and fluorescent lipophilic  
488 carbocyanine dye Dil. We thank Guangshuo Ou at School of Life Sciences, Tsinghua

489 University for kindly providing OSM-6::GFP strain and Qing Wei at Shenzhen Institutes  
490 of Advanced Technology, Chinese Academy of Sciences for providing *Par13::MKS-*  
491 *5::mCherry* and *Par13::DYF-19::mCherry* plasmids. This work was supported by the  
492 National Key Research and Development Program of China (2021ZD0203100), the  
493 National Natural Science Foundation of China (32122038, 31970933, and 32170963),  
494 the Basic Research Project from the Science and Technology Commission of  
495 Shanghai Municipality (21JC1404500 and 19JC1414100), Shuguang Program  
496 supported by Shanghai Education Development Foundation and Shanghai Municipal  
497 Education Commission (21SG16), Program for Young Scholars of Special  
498 Appointment at Shanghai Institutions of Higher Learning (QD2018017), and Innovative  
499 research team of high-level local universities in Shanghai (SHSMU-ZDCX20211102).  
500 We thank the *C. elegans* Genetics Stock Center, National BioResource Project (NBRP)  
501 for sharing strains and reagents. We also thank the Molecular Imaging Core Facility  
502 (MICF) at the School of Life Science and Technology, ShanghaiTech University for  
503 help in imaging.

504

## 505 **AUTHOR CONTRIBUTIONS**

506 CS, XZ, WZ, XT, and QL designed experiments and analyzed data; CS, XT, and QL  
507 wrote the manuscript; XZ performed molecular cloning and microinjection experiments;  
508 WZ performed molecular cloning; CS performed molecular cloning, microinjection,  
509 imaging, and electron microscopy experiments.

510

## 511 **FIGURE LEGENDS**

512 **Figure 1. WDR47/NMTN-1 is expressed in the AWB chemosensory neuron pair**  
513 **and localized in the BB region.** (A) WDR47/NMTN-1 is expressed in the amphids  
514 and phasmids of *C. elegans*. The left and right images are enlarged views of the  
515 phasmids and amphids, respectively. (B) Representative images of *Pnmtn-1::GFP*  
516 signals in five pairs of olfactory neurons. The AWA, AWB, and AWC neurons are  
517 marked by *Podr-10::mCherry*, *Pstr-1::mCherry*, and *Pstr-2::mCherry*. The ASH and  
518 ADL neurons are marked by *Psrb-6::mCherry*. (C) Quantification of *Pnmtn-1::GFP*

519 signals in five pairs of olfactory neurons. (D) Representative images showing *Pnmtn-*  
520 *1::MNG::NMTN-1* signals. The AWB neurons were visualized via expression of *Pstr-*  
521 *1::mCherry*. White arrowhead, blue arrowhead, and white arrow indicate cilia, the cilia  
522 base, and dendrites, respectively. (E) Representative images showing *Pnmtn-*  
523 *1::NMTN-1::MNG* signals. The AWB neurons were marked by expression of *Pstr-*  
524 *1::mCherry*. White arrowhead, blue arrowhead, and white arrow indicate cilia, cilia  
525 base, and dendrites, respectively. (F) Colocalization of *Pstr-1::MNG::NMTN-1* and the  
526 BB (*Pstr-1::DYF-19::mCherry*) marker. (G) Quantification of the fluorescence  
527 intensities of *Pstr-1::MNG::NMTN-1* in BB and other parts of the cilia. Each cilium  
528 analyzed is represented by a dot. Data are presented as mean values  $\pm$  SEM. \*\*\*\* P  
529  $< 0.0001$  by two-tailed Student's t-test. (H) Schematic illustration of the AWB cilia and  
530 the location of transition zone (TZ) and basal body (BB). MKS-5 and DYF-19 are  
531 markers for the TZ and the BB, respectively.

532

533 **Figure 2. *Wdr47/nmtn-1* mutants exhibit defects in the AWB cilia morphology.** (A)  
534 Representative images of the AWB cilia in three categories according to cilia  
535 morphology. Cilia were visualized using the *Pstr-1::GFP* marker, and were classified  
536 into three categories according to the cilia morphology. (B) Quantification of the AWB  
537 cilia in three categories in wild type (WT) and *wdr47/nmtn-1* mutants. (C)  
538 Quantification of the cilia length of the AWB neurons in WT and *wdr47/nmtn-1* mutants.  
539 Each cilium analyzed is represented by a dot. Data are presented as mean values  $\pm$   
540 SEM. (D-F) The *wdr47/nmtn-1* mutants exhibited cell-specific defects in uptake of the  
541 lipophilic dye Dil. Representative images of Dil uptake in amphid sensory neurons in  
542 WT and *wdr47/nmtn-1* mutants are displayed. The dotted lines represent AWB  
543 neurons (D). The dye-filling defect in AWB neurons of *wdr47/nmtn-1* animals was  
544 rescued by expression of *Pstr-1::MNG::NMTN-1* (E). In contrast, the dye uptake in  
545 other neurons (random dye-filled non-AWB neurons) was normal in *wdr47/nmtn-1*  
546 mutants (F). Each neuron analyzed is represented by a dot. Data are presented as  
547 mean values  $\pm$  SEM. In B, \*\*\*\* P  $< 0.0001$  by Chi-square test. In C and E, \* P  $< 0.05$ ,  
548 \*\*\* P  $< 0.001$ , and \*\*\*\* P  $< 0.0001$  by two-tailed Student's t-test. In F, n.s. not significant

549 by two-tailed Student's t-test.

550

551 **Figure 3. *Wdr47/nmt-1* mutants have defects in AWB-mediated aversion**

552 **behaviors.** (A) Schematic illustration of the chemotaxis assays. (B) Quantification of

553 chemotaxis indexes for AWB-mediated aversion behaviors to 2-nonanone in wild type

554 (WT) and *wdr47/nmt-1* mutants. The reduction in behavioral responses to 2-

555 nonanone in *wdr47/nmt-1* mutants can be rescued by expression of WDR47/NMTN-

556 1 under its endogenous promoter or the AWB-specific *str-1* promoter. (C)

557 Quantification of chemotaxis indexes for aversion behaviors to octanol mediated by

558 the AWB, ASH, and ADL neurons in WT and *wdr47/nmt-1* mutants. (D) Quantification

559 of chemotaxis indexes for AWA-mediated attraction behaviors to diacetyl at the

560 indicated concentrations in WT and *wdr47/nmt-1* mutants. (E) Quantification of

561 chemotaxis indexes for AWC-mediated attraction behaviors to isopentyl alcohol at the

562 indicated concentrations in WT and *wdr47/nmt-1* mutants. Each dot represents a

563 single population assay calculated as shown. Data are presented as mean values  $\pm$

564 SEM. In B, \*  $P < 0.05$ , \*\*  $P < 0.01$  by two-tailed Student's t-test. In C and E, \*  $P < 0.05$ ,

565 by two-tailed Student's t-test. In D and E, n.s. not significant by two-tailed Student's t-

566 test.

567

568 **Figure 4. IFT velocities and localization of ciliary channel are altered in**

569 ***wdr47/nmt-1* mutants.** (A) Histograms and kymographs of KAP-1::MNG, OSM-

570 3::MNG, and OSM-6::MNG anterograde middle segment velocities in the AWB cilia of

571 WT and *wdr47/nmt-1* mutants. KAP-1::MNG, OSM-3::MNG and OSM-6::MNG were

572 expressed under the AWB-specific *str-1* promoter. Average velocities are indicated at

573 top right in each panel as mean values  $\pm$  SEM. The scale bars represent 2  $\mu$ m

574 (horizontal) and 10 s (vertical). (B) Representative images of the *Pstr-1::TAX-4::sfGFP*

575 fusion protein and the AWB cilia marked by *Pstr-1::mCherry* in WT and *wdr47/nmt-1*

576 mutants. TAX-4 is localized throughout cilia in all of WT animals, while TAX-4 is clearly

577 detained the base of cilia in 30% of *wdr47/nmt-1* mutants. (C) Representative images

578 of the *Pstr-1::TAX-4::sfGFP* fusion protein and the BB protein marked by *Pstr-1::DYF-*

579 19::mCherry in WT and *wdr47/nmtn-1* mutants. TAX-4 is localized throughout cilia in  
580 all of WT animals, while TAX-4 is clearly detained the base of cilia in 24% of  
581 *wdr47/nmtn-1* mutants. However, the detained TAX-4 in the base of AWB cilia is not  
582 co-localized with DYF-19.

583

584 **Table 1. Transport velocities of MNG tagged IFT proteins in wild type (WT) and**  
585 ***wdr47/nmtn-1* mutant animals.** n, number of particles; N, number of measured  
586 animals.

587

588 **Supplementary Figure 1. The expression pattern of *Pnmtn-1::MNG::NMTN-1* at**  
589 **different *C. elegans* developmental stages.** (A) Representative images showing  
590 *Pnmtn-1::MNG::NMTN-1* signals in the egg of *C. elegans*. The AWB neurons are  
591 marked by expression of *Pstr-1::mCherry*. (B) Representative images showing *Pnmtn-*  
592 *1::MNG::NMTN-1* signals in the L1, L2, L3, L4, day 1 adult, and day 4 adult of *C.*  
593 *elegans*. The AWB neurons were visualized by expression of *Pstr-1::mCherry*. The  
594 dotted lines represent the AWB neurons. White arrowhead, blue arrowhead, and white  
595 arrow indicate cilia, the cilia base, and dendrites, respectively.

596

597 **Supplementary Figure 2. Colocalization of *Pstr-1::MNG::NMTN-1* with the TZ**  
598 **(*MKS-5::mCherry*) and BB (*DYF-19::mCherry*) markers.** (A-B) The arrowheads  
599 represent the positions of MKS-5 and DYF-19 in the AWB neurons. The dashed lines  
600 represent the cilia location. Fluorescence intensities are shown below each  
601 representative images. The dashed boxes show the regions for quantification of  
602 fluorescence intensity (starting from the lower right).

603

604 **Supplementary Figure 3. Representative images of *Pstr-1::DYF-19::mCherry***  
605 **localization in the AWB neurons of wild type (WT) and *wdr47/nmtn-1* mutants.**  
606 AWB neurons were visualized using *Pstr-1::mCherry*.

607

608 **Supplementary Figure 4. *Wdr47/nmtn-1* mutants do not have defects in the**

609 **morphology of other olfactory neurons.** (A) Representative images (top) and  
610 cartoons (bottom) of the normal and abnormal cilia of the AWC neurons. The AWC  
611 cilia were visualized by expression of *Pstr-2::GFP*. (B) The percentages of animals  
612 having the normal and abnormal cilia of the AWC neurons in wild type (WT) and  
613 *wdr47/nmtn-1* mutants are shown. (C) Quantification of the AWC cilia area in WT and  
614 *wdr47/nmtn-1* mutants. Each cilium analyzed is represented by a dot. Data are  
615 presented as mean values  $\pm$  SEM. (D) Representative image of the *OSM-6::GFP*  
616 fusion protein. The line represents the length of cilia labeled by *OSM-6::GFP*. (E)  
617 Quantification of the cilia length labeled by *OSM-6::GFP* in WT and *wdr47/nmtn-1*  
618 mutants. Each cilium analyzed is represented by a dot. Data are presented as mean  
619 values  $\pm$  SEM. In C and E, n.s. not significant by two-tailed Student's t-test.

620

621 **Supplementary Figure 5. Ultrastructure of amphid cilia in wild type (WT) and**  
622 ***wdr47/nmtn-1* mutants.** Representative TEM images (cross-sections) of the amphid  
623 cilia distal and middle segment in WT and *wdr47/nmtn-1* mutants. White arrowheads  
624 indicate the AWB cilia.

625

626 **Supplementary Figure 6. Representative images of IFT movement.** (A)  
627 Representative images of *Pstr-1::OSM-6::GFP*, *Pstr-1::OSM-3::GFP*, *Pstr-1::KAP-*  
628 *1::GFP*, and *Psr6-6::OSM-6::GFP* for analyses of IFT particle movement. (B) The  
629 kymograph image of *WDR47/NMTN-1*. The anterograde and retrograde kymograph  
630 images of *Pnmtn-1::MNG::NMTN-1* fusion protein show that *WDR47/NMTN-1* is not  
631 moving by itself.

632

633 **Supplementary Table 1. List of *C. elegans* strains used in this study.** Summary of  
634 strain name, genotype, generating method, and resource of strains.

635

636 **Supplementary Table 2. List of chemicals, kits, and primers used for generating**  
637 **cell-specific promoters.**

638

639 **REFERENCES**

- 640 Andrea G. Brear, J. Y., Martin Wojtyniak, and Piali Sengupta (2014). "Diverse Cell  
641 Type-Specific Mechanisms Localize G Protein-Coupled Receptors to *Caenorhabditis*  
642 *elegans* Sensory Cilia." genetics **197**: 667-684.
- 643 Bargmann, C. I. (2006). "Chemosensation in *C. elegans*." WormBook: 1-29.
- 644 Bargmann, C. M. C. a. C. I. (1996). "A Putative Cyclic Nucleotide-Gated Channel."  
645 Neuron **17**: 695-706.
- 646 Barr, Y.-K. B. a. M. M. (2011). "Sensory roles of neuronal cilia: Cilia development,  
647 morphogenesis, and function in *C. elegans*." Front Biosci. **13**: 5959-5974.
- 648 Bear, D. M., J. M. Lassance, H. E. Hoekstra and S. R. Datta (2016). "The Evolving  
649 Neural and Genetic Architecture of Vertebrate Olfaction." Curr Biol **26**(20): R1039-  
650 R1049.
- 651 Berbari, N. F., A. K. O'Connor, C. J. Haycraft and B. K. Yoder (2009). "The primary  
652 cilium as a complex signaling center." Curr Biol **19**(13): R526-535.
- 653 Blacque, O. E., M. J. Reardon, C. M. Li, J. McCarthy, M. R. Mahjoub, S. J. Ansley, L.  
654 L. Badano, A. K. Mah, P. L. Beales, W. S. Davidson, R. C. Johnsen, M. Audeh, R. H.  
655 A. Plasterk, D. L. Baillie, N. Katsanis, L. M. Quarmby, S. R. Wicks and M. R. Leroux  
656 (2004). "Loss of *C. elegans* BBS-7 and BBS-8 protein function results in cilia defects  
657 and compromised intraflagellar transport." Genes & Development **18**(13): 1630-1642.
- 658 Bloodgood, R. A. (2010). "Sensory reception is an attribute of both primary cilia and  
659 motile cilia." J Cell Sci **123**(Pt 4): 505-509.
- 660 Brown, J. M. and G. B. Witman (2014). "Cilia and Diseases." Bioscience **64**(12): 1126-  
661 1137.
- 662 Brust-Mascher, I., G. Ou and J. M. Scholey (2013). "Measuring rates of intraflagellar  
663 transport along *Caenorhabditis elegans* sensory cilia using fluorescence microscopy."  
664 Methods Enzymol **524**: 285-304.
- 665 Buijs, R. R., J. J. A. Hummel, M. Burute, X. Pan, Y. Cao, R. Stucchi, M. Altelaar, A.  
666 Akhmanova, L. C. Kapitein and C. C. Hoogenraad (2021). "WDR47 protects neuronal  
667 microtubule minus ends from katanin-mediated severing." Cell Rep **36**(2): 109371.
- 668 Cevik, S., Y. Hori, O. I. Kaplan, K. Kida, T. Toivenon, C. Foley-Fisher, D. Cottell, T.  
669 Katada, K. Kontani and O. E. Blacque (2010). "Joubert syndrome Arl13b functions at  
670 ciliary membranes and stabilizes protein transport in *Caenorhabditis elegans*." J Cell  
671 Biol **188**(6): 953-969.
- 672 Challis, R. C., H. Tian, J. Wang, J. He, J. Jiang, X. Chen, W. Yin, T. Connelly, L. Ma,  
673 C. R. Yu, J. L. Pluznick, D. R. Storm, L. Huang, K. Zhao and M. Ma (2015). "An

- 674 Olfactory Cilia Pattern in the Mammalian Nose Ensures High Sensitivity to Odors."  
675 Curr Biol **25**(19): 2503-2512.
- 676 Chao, M. Y., H. Komatsu, H. S. Fukuto, H. M. Dionne and A. C. Hart (2004). "Feeding  
677 status and serotonin rapidly and reversibly modulate a *Caenorhabditis elegans*  
678 chemosensory circuit." Proc Natl Acad Sci U S A **101**(43): 15512–15517.
- 679 Chen, Y., J. Zheng, X. Li, L. Zhu, Z. Shao, X. Yan and X. Zhu (2020). "Wdr47 Controls  
680 Neuronal Polarization through the Camsap Family Microtubule Minus-End-Binding  
681 Proteins." Cell Rep **31**(3): 107526.
- 682 Cornelia I. Bargmann, t. E. H., and H. Robert Horvitz (1993). "Odorant-Selective  
683 Genes and Neurons Mediate Olfaction in *C. elegans*." Cell **74**: 515-527,.
- 684 Dasgupta, A. and J. D. Amack (2016). "Cilia in vertebrate left-right patterning." Philos  
685 Trans R Soc Lond B Biol Sci **371**(1710).
- 686 David B Doroquez, C. Berciu and D. Nicastro (2014). "A high-resolution morphological  
687 and ultrastructural map of anterior sensory cilia and glia in *Caenorhabditis elegans*."  
688 eLife.
- 689 Emily R. Troemel, B. E. K., and Cornelia I. Bargmann (1997). "Reprogramming  
690 Chemotaxis Responses: Sensory Neurons Define Olfactory Preferences in *C.*  
691 *elegans*." Cell **91**: 161-169.
- 692 Goetz, S. C. and K. V. Anderson (2010). "The primary cilium: a signalling centre during  
693 vertebrate development." Nat Rev Genet **11**(5): 331-344.
- 694 Hao, L. and J. M. Scholey (2009). "Intraflagellar transport at a glance." Cell Science  
695 at a Glance **122**: 889-892.
- 696 Hart, A. C. and M. Y. Chao (2010). *Frontiers in Neuroscience. From Odors to Behaviors*  
697 *in Caenorhabditis elegans*. The Neurobiology of Olfaction.
- 698 Inglis, P. N., G. Ou, M. R. Leroux and J. M. Scholey (2007). "The sensory cilia of  
699 *Caenorhabditis elegans*." WormBook: 1-22.
- 700 Ishikawa, H. and W. F. Marshall (2011). "Ciliogenesis: building the cell's antenna." Nat  
701 Rev Mol Cell Biol **12**(4): 222-234.
- 702 Jauregui, A. R., K. C. Q. Nguyen, D. H. Hall and M. M. Barr (2008). "The  
703 *Caenorhabditis elegans* nephrocystins act as global modifiers of cilium structure." J  
704 Cell Biol **180**(5): 973-988.
- 705 Jenkins, P. M., D. P. McEwen and J. R. Martens (2009). "Olfactory cilia: linking sensory  
706 cilia function and human disease." Chem Senses **34**(5): 451-464.
- 707 Jordan, M. A. and G. Pigino (2021). "The structural basis of intraflagellar transport at



- 708 a glance." J Cell Sci **134**(12).
- 709 Jung, I., T. R. Powers and J. M. Valles, Jr. (2014). "Evidence for two extremes of ciliary  
710 motor response in a single swimming microorganism." Biophys J **106**(1): 106-113.
- 711 Kannan, M., Efil Bayam, C. Wagner, Bruno Rinaldif, Perrine F. Kretz, P. Tilly, Marna  
712 Roosg, Lara McGillewih, Séverine Bärf, Shilpi Minochae, Claire Chevalier, Chrystelle  
713 Poi, S. M. G. Project, J. Chelly, J.-L. Mandel, Renato Borgattik, A. Piton, Craig  
714 Kinneearh, Ben Loosg, D. J. Adams, Y. Hérault, S. C. Collins, Sylvie Friantf, J. D. Godin  
715 and B. Yalcin (2017). "WD40-repeat 47, a microtubule-associated protein, is essential  
716 for brain development and autophagy." PNAS: E9308-E9317.
- 717 Kaplan, O. I., D. B. Doroquez, S. Cevik, R. V. Bowie, L. Clarke, A. A. Sanders, K. Kida,  
718 J. Z. Rappoport, P. Sengupta and O. E. Blacque (2012). "Endocytosis genes facilitate  
719 protein and membrane transport in *C. elegans* sensory cilia." Curr Biol.
- 720 Kim, Y. and S. H. Kim (2020). "WD40-Repeat Proteins in Ciliopathies and Congenital  
721 Disorders of Endocrine System." Endocrinol Metab (Seoul) **35**(3): 494-506.
- 722 Kobayashi, T. and B. D. Dynlacht (2011). "Regulating the transition from centriole to  
723 basal body." J Cell Biol **193**(3): 435-444.
- 724 Kulaga, H. M., C. C. Leitch, E. R. Eichers, J. L. Badano, A. Leemann, B. E. Hoskins,  
725 J. R. Lupski, P. L. Beales, R. R. Reed and N. Katsanis (2004). "Loss of BBS proteins  
726 causes anosmia in humans and defects in olfactory cilia structure and function in the  
727 mouse." Nat Genet **36**(9): 994-998.
- 728 Lechtreck, K. F. (2015). "IFT-Cargo Interactions and Protein Transport in Cilia." Trends  
729 Biochem Sci **40**(12): 765-778.
- 730 Li, Q. and S. D. Liberles (2015). "Aversion and attraction through olfaction." Curr Biol  
731 **25**(3): R120-129.
- 732 Liu, H., J. Zheng, L. Zhu, L. Xie, Y. Chen, Y. Zhang, W. Zhang, Y. Yin, C. Peng, J. Zhou,  
733 X. Zhu and X. Yan (2021). "Wdr47, Camsaps, and Katanin cooperate to generate  
734 ciliary central microtubules." Nat Commun **12**(1): 5796.
- 735 Manabi Fujiwara, T. I. a. I. K. (1999). "A novel WD40 protein, CHE-2, acts cell  
736 autonomously in the formation of *C. elegans* sensory cilia." Development(126): 4839-  
737 4848
- 738 Marshall, W. F. (2008). Chapter 1 Basal Bodies. Ciliary Function in Mammalian  
739 Development: 1-22.
- 740 Morsci, N. S. and M. M. Barr (2011). "Kinesin-3 KLP-6 regulates intraflagellar transport  
741 in male-specific cilia of *Caenorhabditis elegans*." Curr Biol **21**(14): 1239-1244.

- 742 Nachury, M. V. (2018). "The molecular machines that traffic signaling receptors into  
743 and out of cilia." Curr Opin Cell Biol **51**: 124-131.
- 744 Nechipurenko, I. V., A. Olivier-Mason, A. Kazatskaya, J. Kennedy, I. G. McLachlan, M.  
745 G. Heiman, O. E. Blacque and P. Sengupta (2016). "A Conserved Role for Girdin in  
746 Basal Body Positioning and Ciliogenesis." Dev Cell **38**(5): 493–506.
- 747 Olivier-Mason, A., M. Wojtyniak, R. V. Bowie, I. V. Nechipurenko, O. E. Blacque and P.  
748 Sengupta (2013). "Transmembrane protein OSTA-1 shapes sensory cilia morphology  
749 via regulation of intracellular membrane trafficking in *C. elegans*." Development **140**(7):  
750 1560-1572.
- 751 Ou, G., O. E. Blacque, J. J. Snow, M. R. Leroux and J. M. Scholey (2005). "Functional  
752 coordination of intraflagellar transport motors." Nature **436**(7050): 583-587.
- 753 Ou, G., M. Koga, O. E. Blacque, T. Murayama, Y. Ohshima, J. C. Schafer, C. Li, B. K.  
754 Yoder, M. R. Leroux and J. M. Scholey (2007). "Sensory ciliogenesis in *Caenorhabditis*  
755 *elegans*: assignment of IFT components into distinct modules based on transport and  
756 phenotypic profiles." Mol Biol Cell **18**(5): 1554-1569.
- 757 Pan, J., Q. Wang and W. J. Snell (2005). "Cilium-generated signaling and cilia-related  
758 disorders." Lab Invest **85**(4): 452-463.
- 759 Pan, X., G. Ou, G. Civelekoglu-Scholey, O. E. Blacque, N. F. Endres, L. Tao, A.  
760 Mogilner, M. R. Leroux, R. D. Vale and J. M. Scholey (2006). "Mechanism of transport  
761 of IFT particles in *C. elegans* cilia by the concerted action of kinesin-II and OSM-3  
762 motors." J Cell Biol **174**(7): 1035-1045.
- 763 Pedersen, L. B. and S. T. Christensen (2012). "Regulating intraflagellar transport." Nat  
764 Cell Biol **14**(9): 904-906.
- 765 Pedersen, L. B., J. M. Schroder, P. Satir and S. T. Christensen (2012). "The ciliary  
766 cytoskeleton." Compr Physiol **2**(1): 779-803.
- 767 Prevo, B., J. M. Scholey and E. J. G. Peterman (2017). "Intraflagellar transport:  
768 mechanisms of motor action, cooperation, and cargo delivery." FEBS J **284**(18): 2905-  
769 2931.
- 770 Qin, H. M., J. L. Rosenbaum and M. M. Barr (2001). "An autosomal recessive  
771 polycystic kidney disease gene homolog is involved in intraflagellar transport in *C*-  
772 *elegans* ciliated sensory neurons." Current Biology **11**(6): 457-461.
- 773 Quidwai, T., J. Wang, E. A. Hall, N. A. Petriman, W. Leng, P. Kiesel, J. N. Wells, L. C.  
774 Murphy, M. A. Keighren, J. A. Marsh, E. Lorentzen, G. Pigino and P. Mill (2021). "A  
775 WDR35-dependent coat protein complex transports ciliary membrane cargo vesicles  
776 to cilia." Elife **10**.

- 777 Reiter, J. F., O. E. Blacque and M. R. Leroux (2012). "The base of the cilium: roles for  
778 transition fibres and the transition zone in ciliary formation, maintenance and  
779 compartmentalization." EMBO Rep **13**(7): 608-618.
- 780 Reiter, J. F. and M. R. Leroux (2017). "Genes and molecular pathways underpinning  
781 ciliopathies." Nat Rev Mol Cell Biol **18**(9): 533-547.
- 782 Ringers, C., E. W. Olstad and N. Jurisch-Yaksi (2020). "The role of motile cilia in the  
783 development and physiology of the nervous system." Philos Trans R Soc Lond B Biol  
784 Sci **375**(1792): 20190156.
- 785 Saikat Mukhopadhyay, Y. L., A. L. Hongmin Qin and S. S. a. P. Sengupta (2007).  
786 "Distinct IFT mechanisms contribute to the generation of ciliary structural diversity in  
787 *C. elegans*." The EMBO Journal **26**: 2966-2980.
- 788 Scheidel, N. and O. E. Blacque (2018). "Intraflagellar Transport Complex A Genes  
789 Differentially Regulate Cilium Formation and Transition Zone Gating." Curr Biol **28**(20):  
790 3279-3287.e3272.
- 791 Scholey, J. M. (2008). "Intraflagellar transport motors in cilia: moving along the cell's  
792 antenna." J Cell Biol **180**(1): 23-29.
- 793 Sengupta, P. (2007). "Generation and modulation of chemosensory behaviors in *C.*  
794 *elegans*." Pflugers Arch **454**(5): 721-734.
- 795 Serwas, D. and A. Dammermann (2015). "Ultrastructural analysis of *Caenorhabditis*  
796 *elegans* cilia." Methods Cell Biol **129**: 341-367.
- 797 Shao, L., W. El-Jouni, F. Kong, J. Ramesh, R. S. Kumar, X. Shen, J. Ren, S. Devendra,  
798 A. Dorschel, M. Wu, I. Barrera, A. Tabari, K. Hu, N. Haque, I. Yambayev, S. Li, A. Kumar,  
799 T. R. Behera, G. McDonough, M. Furuichi, M. Xifaras, T. Lu, R. M. Alhayaza, K.  
800 Miyabayashi, Q. Fan, A. K. Ajay and J. Zhou (2020). "Genetic reduction of cilium length  
801 by targeting intraflagellar transport 88 protein impedes kidney and liver cyst formation  
802 in mouse models of autosomal polycystic kidney disease." Kidney Int **98**(5): 1225-  
803 1241.
- 804 Sharma, N., N. F. Barbari and B. K. Yoder (2008). "Ciliary dysfunction in developmental  
805 abnormalities and diseases." Curr Top Dev Biol **85**: 371-427.
- 806 Silverman, M. A. and M. R. Leroux (2009). "Intraflagellar transport and the generation  
807 of dynamic, structurally and functionally diverse cilia." Trends Cell Biol **19**(7): 306-316.
- 808 Soares, H., B. Carmona, S. Nolasco and L. Viseu Melo (2019). "Polarity in Ciliate  
809 Models: From Cilia to Cell Architecture." Front Cell Dev Biol **7**: 240.
- 810 Tong, Y. G. and T. R. Burglin (2010). "Conditions for dye-filling of sensory neurons in  
811 *Caenorhabditis elegans*." J Neurosci Methods **188**(1): 58-61.

- 812 Uytingco, C. R., W. W. Green and J. R. Martens (2019). "Olfactory Loss and  
813 Dysfunction in Ciliopathies: Molecular Mechanisms and Potential Therapies." Curr  
814 Med Chem **26**(17): 3103-3119.
- 815 Uytingco, C. R., C. L. Williams, C. Xie, D. T. Shively, W. W. Green, K. Ukhanov, L.  
816 Zhang, D. Y. Nishimura, V. C. Sheffield and J. R. Martens (2019). "BBS4 is required  
817 for intraflagellar transport coordination and basal body number in mammalian olfactory  
818 cilia." J Cell Sci **132**(5).
- 819 Wang, W., V. F. Lundin, I. Millan, A. Zeng, X. Chen, J. Yang, E. Allen, N. Chen, G. Bach,  
820 A. Hsu, M. T. Maloney, M. Kapur and Y. Yang (2012). "Nemitin, a novel Map8/Map1s  
821 interacting protein with Wd40 repeats." PLoS One **7**(4): e33094.
- 822 Wei, Q., K. Ling and J. Hu (2015). "The essential roles of transition fibers in the context  
823 of cilia." Curr Opin Cell Biol **35**: 98-105.
- 824 Wei, Q., Q. Xu, Y. Zhang, Y. Li, Q. Zhang, Z. Hu, P. C. Harris, V. E. Torres, K. Ling and  
825 J. Hu (2013). "Transition fibre protein FBF1 is required for the ciliary entry of  
826 assembled intraflagellar transport complexes." Nat Commun **4**: 2750.
- 827 Williams, C. L., C. Li, K. Kida, P. N. Inglis, S. Mohan, L. Semenec, N. J. Bialas, R. M.  
828 Stupay, N. Chen, O. E. Blacque, B. K. Yoder and M. R. Leroux (2011). "MKS and NPHP  
829 modules cooperate to establish basal body/transition zone membrane associations  
830 and ciliary gate function during ciliogenesis." J Cell Biol **192**(6): 1023-1041.
- 831 Wojtyniak, M., A. G. Brear, D. M. O'Halloran and P. Sengupta (2013). "Cell- and  
832 subunit-specific mechanisms of CNG channel ciliary trafficking and localization in *C.*  
833 *elegans*." J Cell Sci **126**(Pt 19): 4381-4395.
- 834 Yi, P., C. Xie and G. Ou (2018). "The kinases male germ cell-associated kinase and  
835 cell cycle-related kinase regulate kinesin-2 motility in *Caenorhabditis elegans* neuronal  
836 cilia." Traffic **19**(7): 522-535.
- 837 Yoshida, K., T. Hirotsu, T. Tagawa, S. Oda, T. Wakabayashi, Y. Iino and T. Ishihara  
838 (2012). "Odour concentration-dependent olfactory preference change in *C. elegans*."  
839 Nat Commun **3**: 739.
- 840

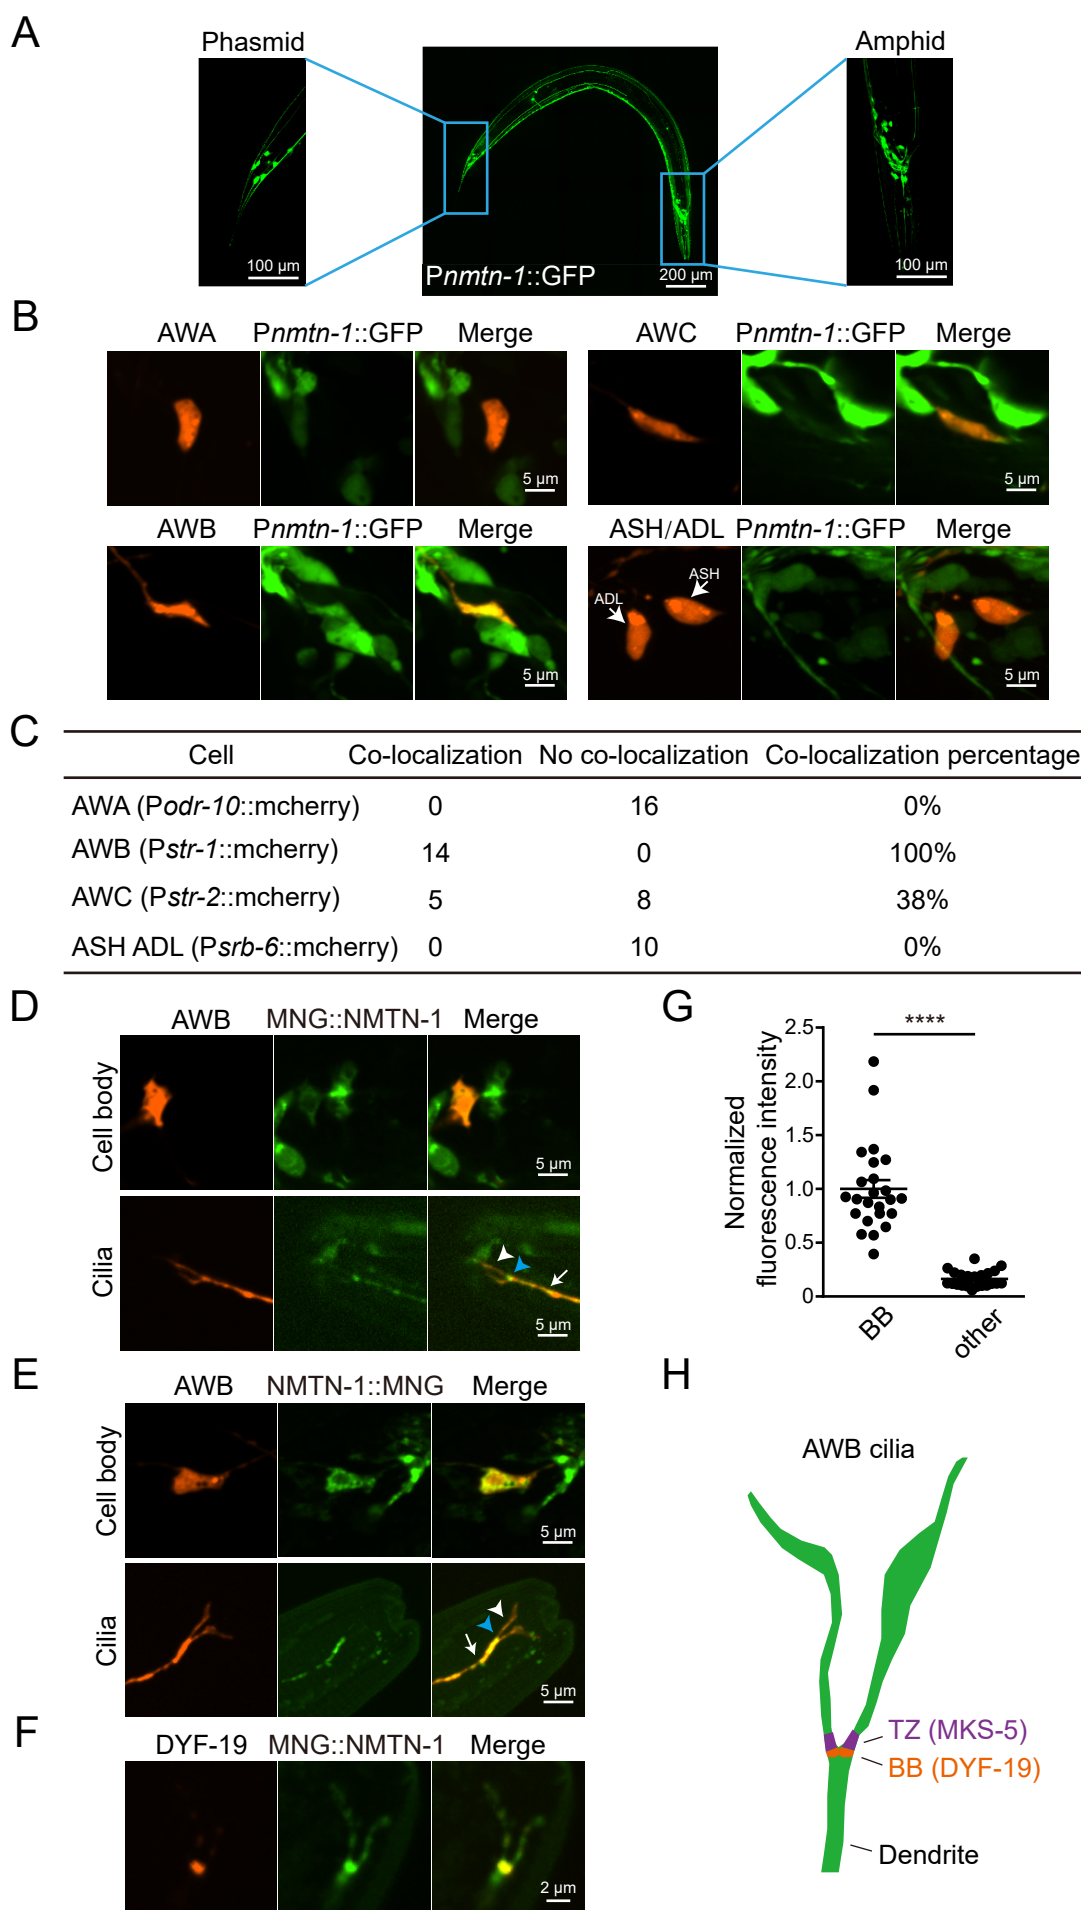

Figure 1

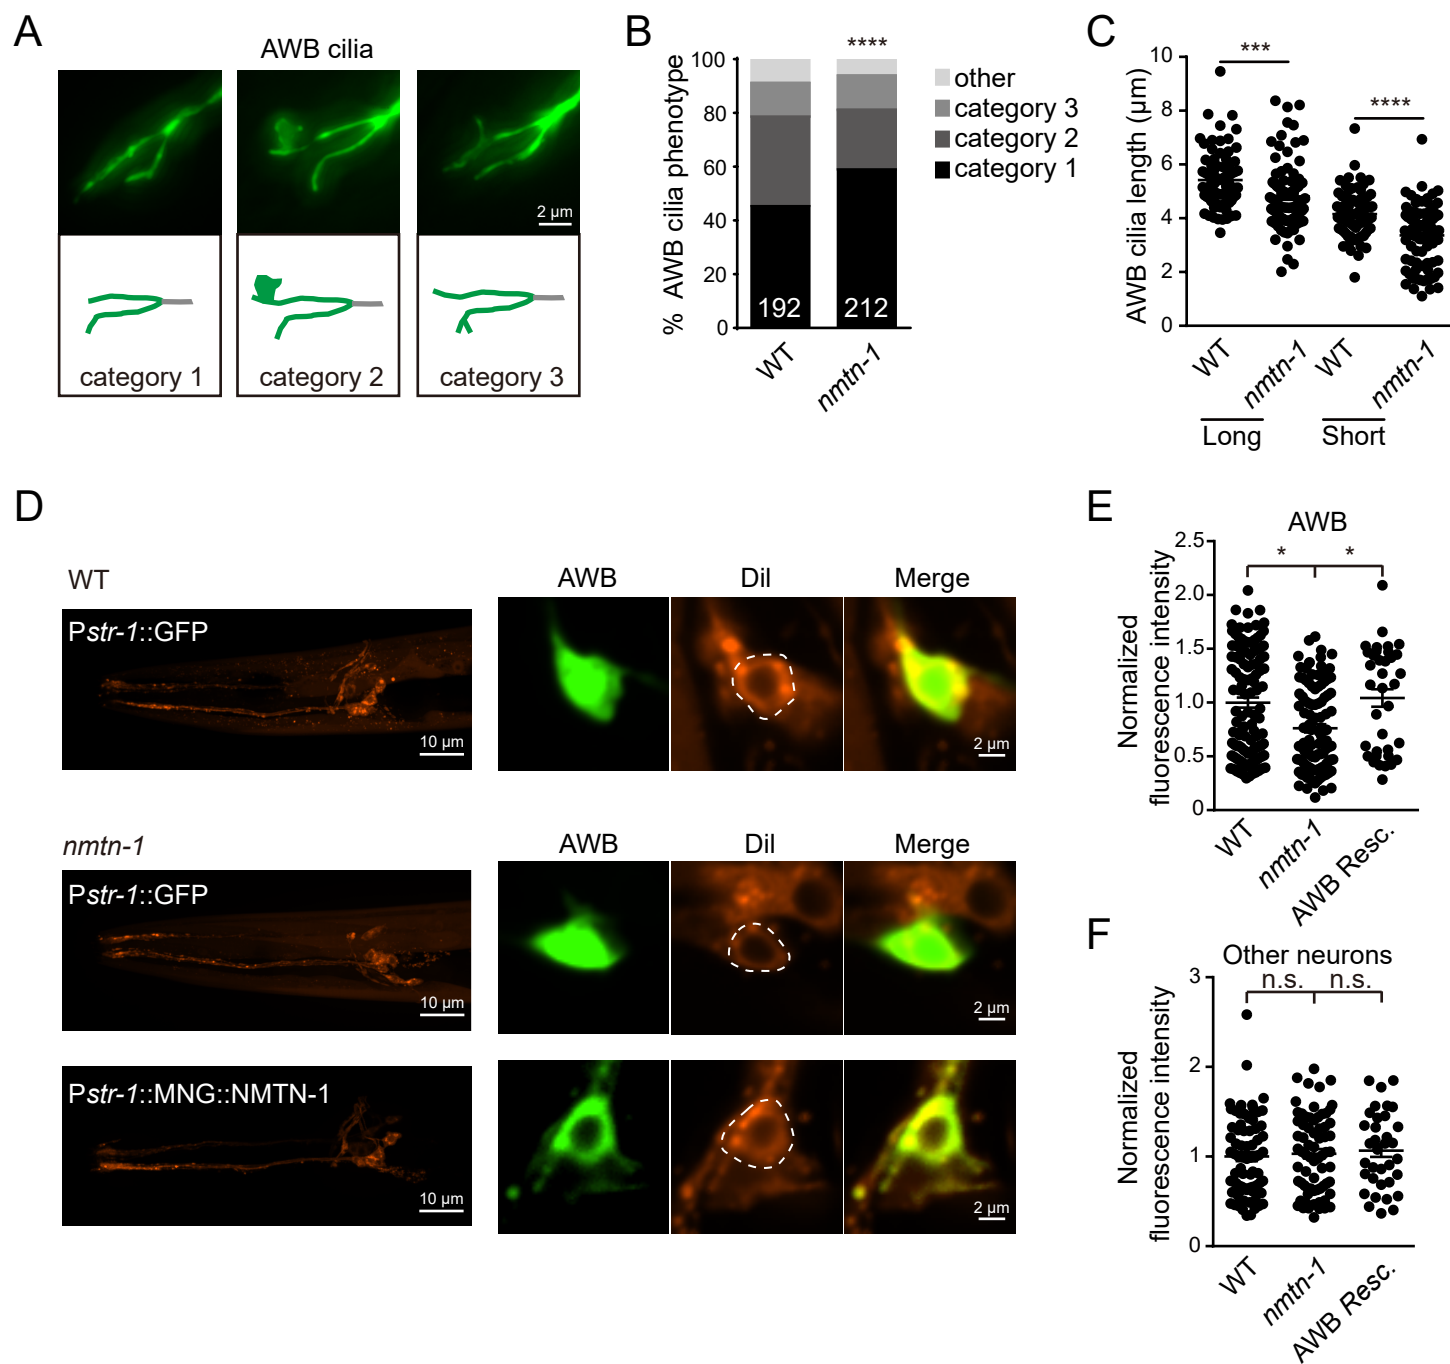

Figure 2

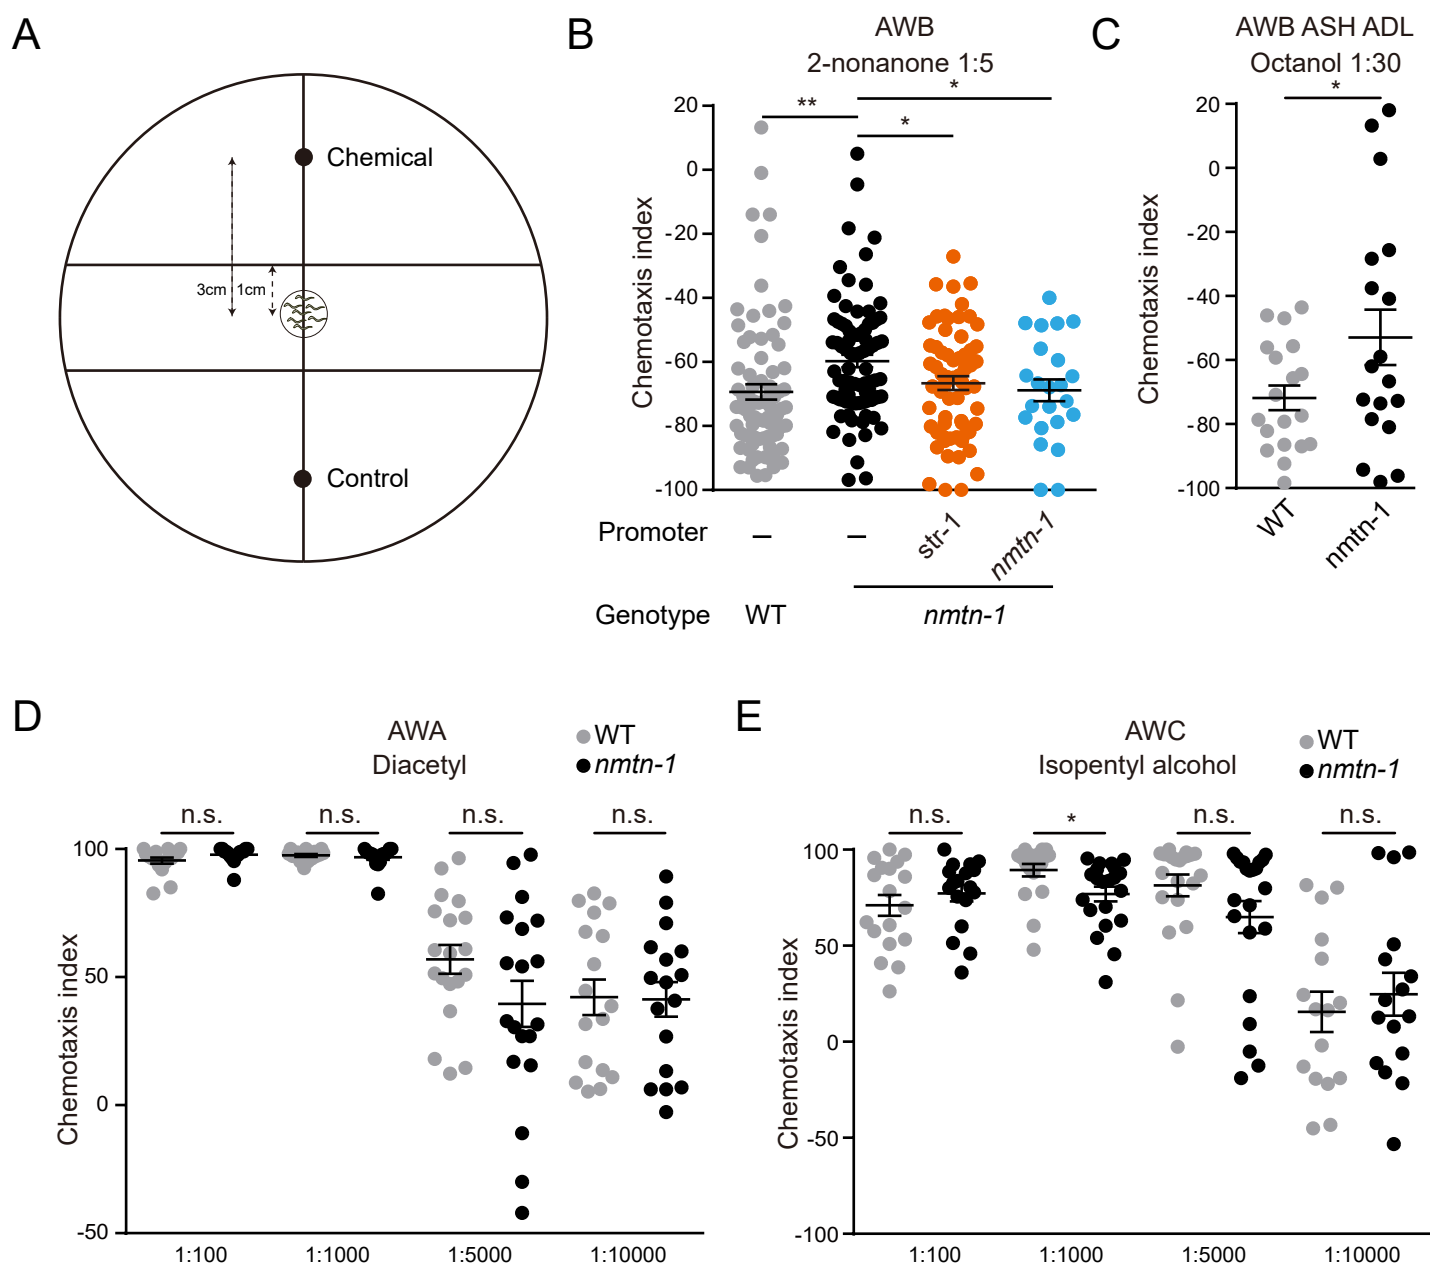

Figure 3

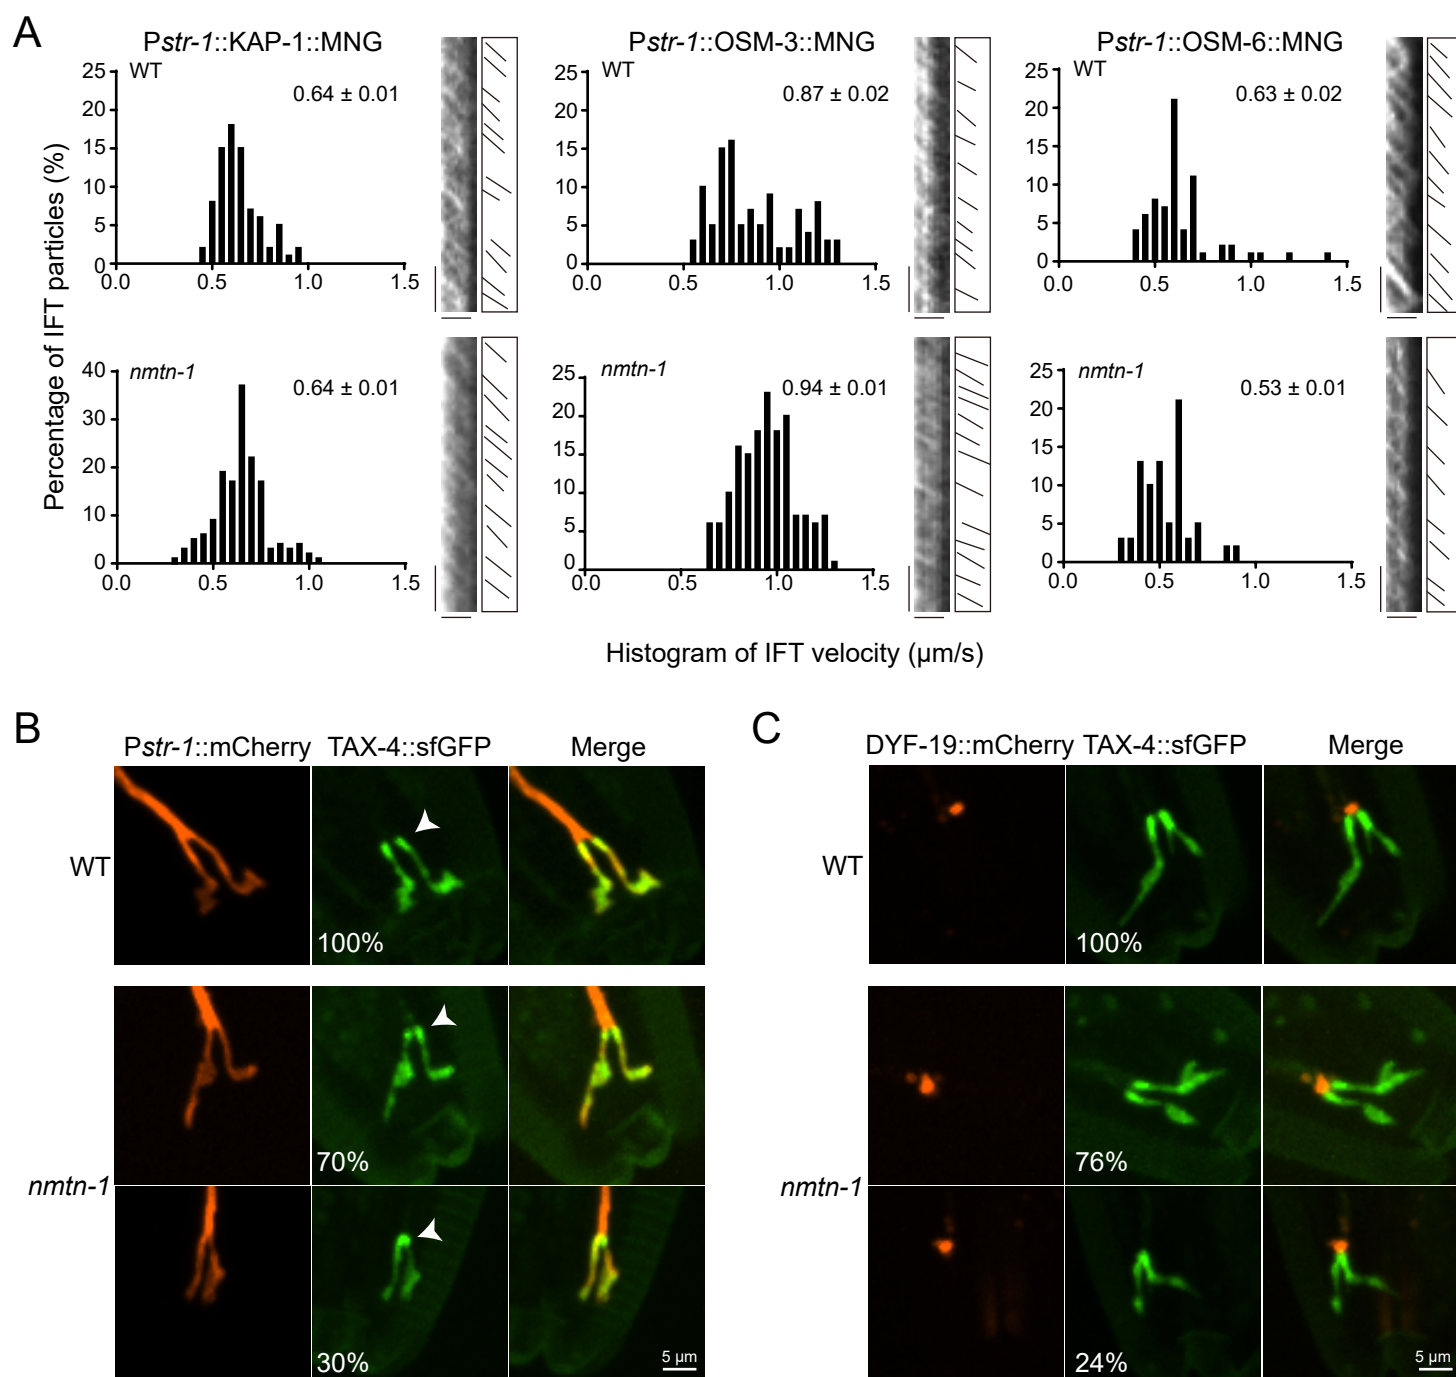

Figure 4



**Table 1. Anterograde IFT velocities in wild type and *wdr47/nmt-1* mutants**

| IFT protein               | Strain       | Middle segment                    |       |        | Distal segment                    |       |        |
|---------------------------|--------------|-----------------------------------|-------|--------|-----------------------------------|-------|--------|
|                           |              | Mean velocity ( $\mu\text{m/s}$ ) | n/N   | t test | Mean velocity ( $\mu\text{m/s}$ ) | n/N   | t test |
| <b>AWB</b>                |              |                                   |       |        |                                   |       |        |
| <i>Pstr-1::KAP-1::MNG</i> | WT           | 0.64 $\pm$ 0.01                   | 81/5  |        | None                              |       |        |
| <i>Pstr-1::KAP-1::MNG</i> | <i>nmt-1</i> | 0.64 $\pm$ 0.01                   | 153/7 | 0.78   | None                              |       |        |
| <i>Pstr-1::OSM-3::MNG</i> | WT           | 0.87 $\pm$ 0.02                   | 104/7 |        | 1.14 $\pm$ 0.07                   | 30/4  |        |
| <i>Pstr-1::OSM-3::MNG</i> | <i>nmt-1</i> | 0.94 $\pm$ 0.01                   | 160/4 | <0.001 | 1.16 $\pm$ 0.07                   | 27/5  | 0.87   |
| <i>Pstr-1::OSM-6::MNG</i> | WT           | 0.63 $\pm$ 0.02                   | 70/5  |        | 1.11 $\pm$ 0.05                   | 15/3  |        |
| <i>Pstr-1::OSM-6::MNG</i> | <i>nmt-1</i> | 0.53 $\pm$ 0.01                   | 80/7  | <0.001 | 0.79 $\pm$ 0.05                   | 15/3  | <0.001 |
| <b>ASH/ADL</b>            |              |                                   |       |        |                                   |       |        |
| <i>Psr-6::OSM-6::MNG</i>  | WT           | 0.81 $\pm$ 0.01                   | 180/8 |        | 1.39 $\pm$ 0.02                   | 180/8 |        |
| <i>Psr-6::OSM-6::MNG</i>  | <i>nmt-1</i> | 0.83 $\pm$ 0.01                   | 175/6 | 0.17   | 1.37 $\pm$ 0.01                   | 175/6 | 0.38   |

Table 1
